# Supplementary material for: Rapid and sensitive naked eye detection of faecal pigments using their enhanced solid-state green fluorescence on a zinc acetate substrate
Source: Royal Society of Chemistry journal article supplement (doi:10.1039/d2ay00878e), 2022-01-01
Supplement: d2ay00878e1.pdf [file d2ay00878e1.pdf]

## Supporting Information

# Rapid and Sensitive Naked Eye Detection of Faecal Pigments Using Their Enhanced Solid-State Green Fluorescence on Zinc Acetate Substrate

Swayam prakash and Ashok Kumar Mishra \*

Department of Chemistry, Indian Institute of Technology Madras, Chennai-600036, India.

Contact: [mishra@iitm.ac.in](mailto:mishra@iitm.ac.in)

### Context

**Figure S1** Excitation spectra of FP-Zn(II) embedded in the surface of zinc acetate crystals with variation in emission wavelength

**Figure S2** EEMF of FP-Zn(II) embedded in the surface of zinc acetate crystals

**Figure S3** Digital images of FP-Zn(II) embedded in the surface of zinc acetate crystals in daylight and in UV 365 nm

**Figure S4** Single-crystal XRD of FP-Zn(II) embedded in the surface of zinc acetate crystals

**Figure S5** Powder XRD of FP-Zn(II) embedded in the surface of zinc acetate crystals

**Table S1** Comparison of fluorescence lifetime ( $\tau$ , ns) of FP-Zn(II) embedded in the surface of zinc acetate crystals with the complexes in the aqueous media

**Figure S6** Time-resolved fluorescence decay of FP-Zn(II) embedded in the surface of zinc acetate crystals

**Figure S7** FTIR spectra of FP-Zn(II) embedded in the surface of zinc acetate crystals

**Figure S8** Steady-state emission spectral behaviour of FPs with various other metal salts

# Supporting Information

**Figure S9** Time-dependent change of fluorescence for FP-Zn(II) embedded in the surface of zinc acetate crystals with excitation of 480 nm

**Figure S10** Digital photograph presentation of zinc acetate coated over the various substrate (TLC plate and cellulose paper)

**Figure S11** Calibration plot of SB-Zn(II) after drop cast of SB on cellulose paper coated with zinc acetate salt with excitation wavelength at 480 nm

**Table S2** Comparison between the suggested method and previous methods for FPs detection.

**Figure S12** Steady-state absorbance and emission of various organic dyes with zinc acetate in the solid-state.

**Figure S13** Comparison of fluorescence enhancement of organic dyes with zinc acetate at excitation of 360 nm and emission of 525 nm.

**Figure S14** Interference of humic acid fluorescence with FPs fluorescence on zinc-coated filter paper

**Figure S15** Excitation spectra, emission spectra and EEMF graph of UB-Zn(II) drop cast on TLC plate

**Figure S16** Fluorescence lifetime decay of UB-Zn(II) complexes on the silica-coated TLC plate

**Table S3** Fluorescence lifetime ( $\tau$ , ns) of UB-Zn(II) complexes on TLC

## EXPERIMENTAL SECTION

The steady-state absorbance and fluorescence of FP-Zn(II) crystals were measured using Shimadzu UV-2600, Fluoromax-4, and Aqualog Horiba Jobin-Yvon spectrophotometer with 150 W xenon lamp as the light source. With the integrating sphere attachment of a UV-Visible spectrophotometer, the absorbance of FP-Zn(II) crystals was measured. The fluorescence from the paper strip was measured with the integrating sphere attachment to Aqualog Horiba Jobin-Yvon spectrophotometer. Solid-state emission of FP-Zn(II) crystals

# Supporting Information

was conducted at a 45 ° angle of front face orientation to prevent scattering,. The Horiba Jobin-Yvon FluoroCube TCSPC lifespan device was used to monitor fluorescence decay. Ludox AS40 colloidal silica was used to record the instrument response function (prompt). The deconvolution technique was used to analyse the decay data using IBH (DAS-6) software. All of the lifetime data goodness fit  $\chi^2$  values were within the acceptable range ( $0.9 \leq \chi^2 \leq 1.4$ ). The following equation was used to compute the average fluorescence lifetime.

$$\tau_{avg} = \frac{\sum_i B_i \tau_i^2}{\sum_i B_i \tau_i} \quad (\text{Eq. 1})$$

where ' $\tau_i$ ' is the fluorescence lifetime and ' $B_i$ ' is the pre-exponential factor of the emission of the  $i^{\text{th}}$  species.

$$\Phi = \frac{k_r}{k_r + k_{nr}} \quad \text{and} \quad \tau = \frac{1}{k_r + k_{nr}} \quad (\text{Eq. 2})$$

where ' $\tau$ ' is the fluorescence lifetime, ' $\phi$ ' is the quantum yield, ' $k_r$ ' is radiative and ' $k_{nr}$ ' is the non-radiative decay constant.

The absolute quantum yield was calculated based on the following equation (Eq. 4) with the Horiba software package.

$$\phi = \frac{N_{em}}{N_{ab}} = \frac{\alpha \int \frac{\lambda}{hc} I_{em} \lambda(d\lambda)}{\alpha \int \frac{\lambda}{hc} [I_{ex}(\lambda) - I'_{ex}(\lambda)] d\lambda} \quad (\text{Eq. 3})$$

Where  $N_{em}$  and  $N_{ab}$  are the respective numbers of emitted and absorbed photons, the term ' $\alpha$ ' is the calibration factor for FP-Zn(II) crystal measurements. The term  $h$ ,  $c$ ,  $I_{em}(\lambda)$  are Planck's constant, velocity of light and the intensity of emitted photons at  $\lambda$  (nm). Corresponding  $I_{ex}(\lambda)$ ,  $I'_{ex}(\lambda)$  are intensities of excited photon beams in the absence and in the presence of the sample, respectively.

# Supporting Information

A Nikon Eclipse Ti Fluorescence Microscope was used to photograph the FP-Zn(II) crystals (Nikon, Japan). FTIR spectra were acquired using a JASCO FT/IR-4100 spectrometer. Single-crystal XRD was carried out by Bruker Single-crystal KAPPA APEXII. Powder XRD analysis was performed using Bruker D8 advance powder Xray diffractometer using Cu K $\alpha$  as the Xray source ( $\lambda= 1.54 \text{ \AA}$ ).

## MATERIAL AND METHODS

Urobilin hydrochloride and stercobilin hydrochloride were purchased from Genetix biotech, India and Frontier Scientific, USA respectively. Various metal salts used in the experiments were purchased from Sigma Aldrich, Rankem, Fischer Scientific and Alfa aesar (India). Commercial humic acid (HA), methylene blue, Protoporphyrin IX, 4- hydroxy-3 nitro coumarin and N, N bis (salicylidene) 1, 2 phenylene diamine (salophen or Schiff base) were purchased from Sigma-Aldrich. Ethylenediaminetetraacetic acid (EDTA) was purchased from Qualigen.

## SUPPLEMENTARY FIGURES AND TABLES

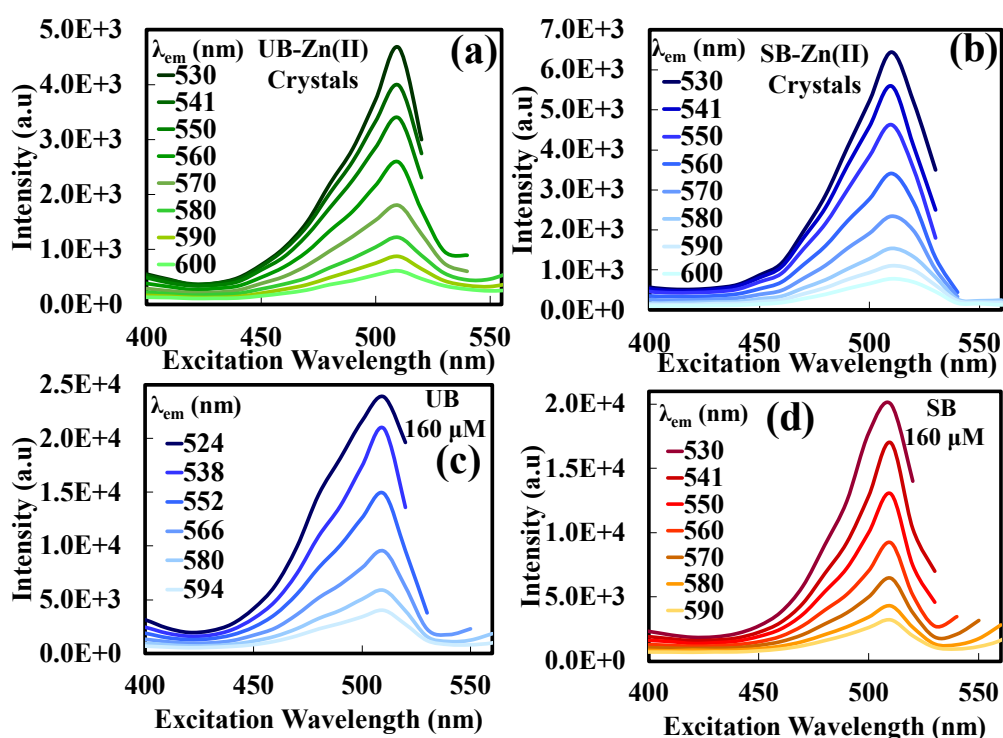

## Supporting Information

**Figure S1.** (a) Excitation spectra of UB-Zn(II) embedded in the surface of zinc acetate crystals with variation of emission wavelength, (b) Excitation spectra of SB-Zn(II) embedded in the surface of zinc acetate crystals with variation of emission wavelength, (c) Excitation spectra of UB drop cast on Zn(II) coated filter paper with variation of emission wavelength and (d) Excitation spectra of SB drop cast on Zn(II) coated filter paper with variation of emission wavelength

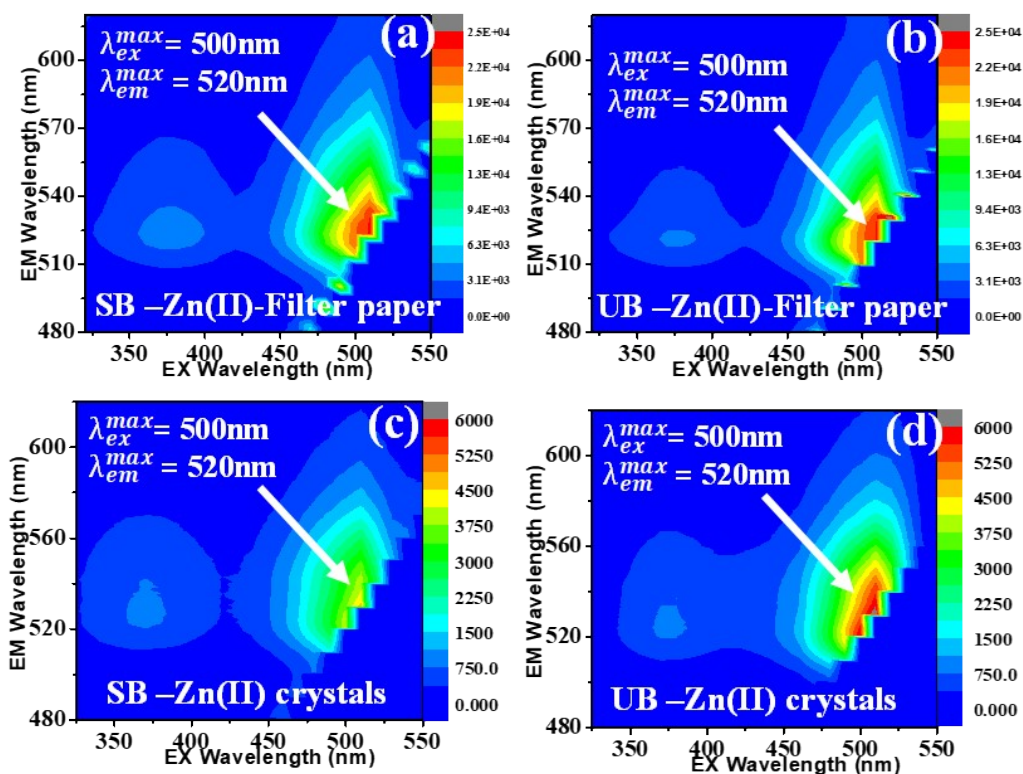

**Figure S2.** (a) EEMF of SB-Zn(II) filter paper, (b) EEMF of UB-Zn(II) filter paper, (c) EEMF of SB-Zn(II) embedded in the surface of zinc acetate crystals and (d) EEMF of UB-Zn(II) embedded in the surface of zinc acetate crystals

## Supporting Information

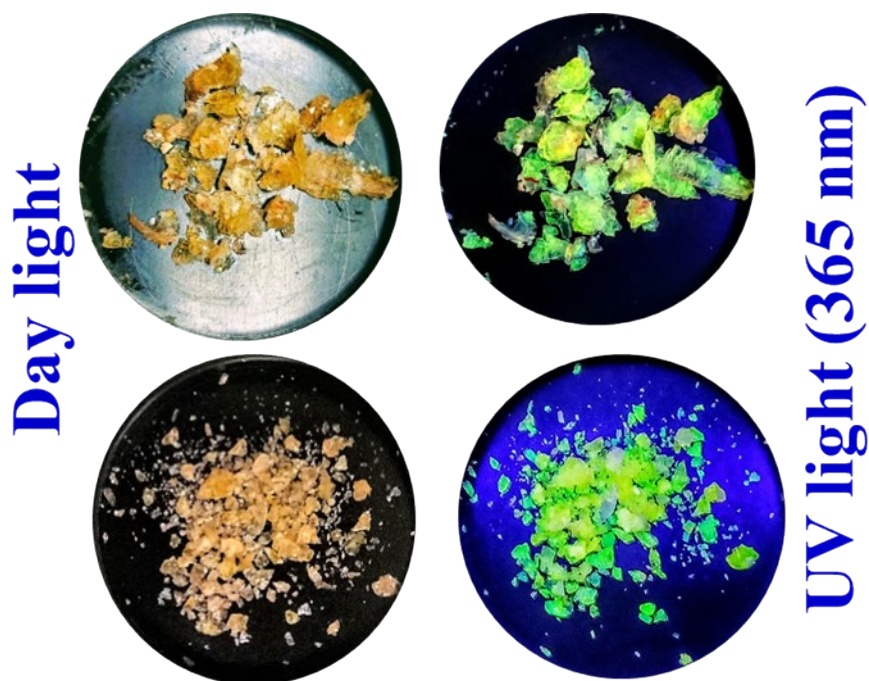

**Figure S3.** Digital images of FP-Zn(II) embedded in the surface of zinc acetate crystals in day light and in UV 365 nm

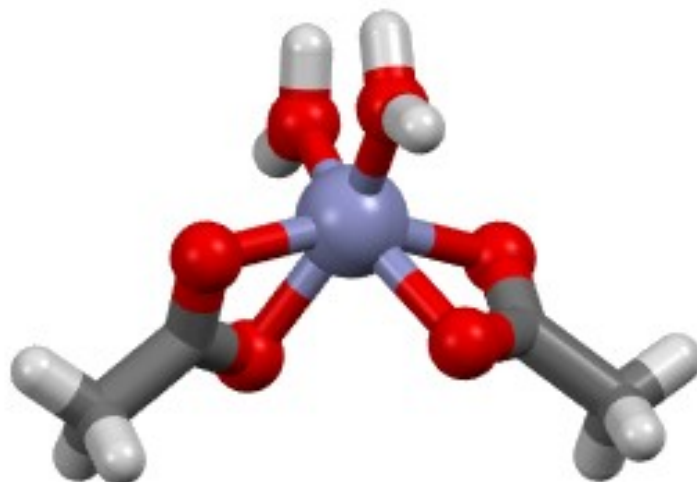

**Figure S4.** Single-crystal XRD of FP-Zn(II) embedded in the surface of zinc acetate crystals indicates the presence of only zinc acetate dihydrate salt crystal

## Supporting Information

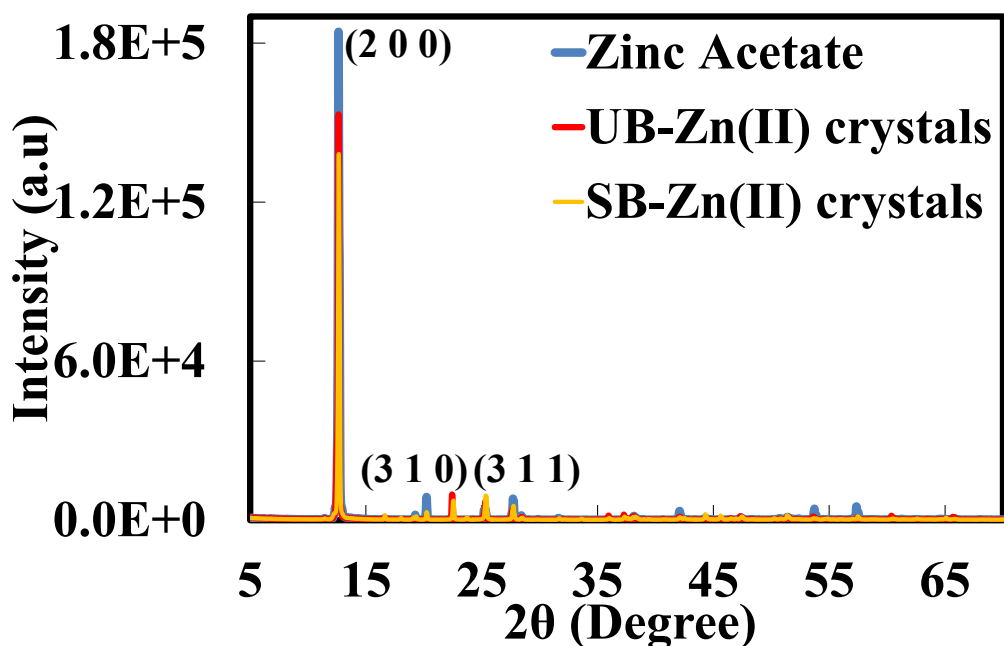

**Figure S5** Powder XRD of FP-Zn(II) embedded in the surface of zinc acetate crystals and comparison with zinc acetate dihydrate salt crystals

**Table S1.** Fluorescence lifetime ( $\tau$ , ns) of FP-Zn(II) complexes in crystal form and in aqueous media at emission maximum wavelengths. The relative amplitude is given in parentheses.  $\lambda_{\text{ex}} = 450$  nm. The error in the measurement =  $\pm 5\%$ . The lifetime data for FP-Zn(II) complexes were taken from *S. Prakash, S. K. Panigrahi, R. P. Dorner, M. Wagner, W. Schmidt and A. K. Mishra, Chemosphere, 2021, 265, 129189* for comparison.

| Samples                       | $\lambda_{\text{ex}} =$       | Lifetime (ns)   |                 | $\tau_{\text{avg}}$<br>(ns) | $\chi^2$ | $k_r(\text{ns}^{-1})$ | $k_{nr}(\text{ns}^{-1})$ |
|-------------------------------|-------------------------------|-----------------|-----------------|-----------------------------|----------|-----------------------|--------------------------|
|                               | 450 nm                        |                 |                 |                             |          |                       |                          |
|                               | $\lambda_{\text{em}}$<br>(nm) | $\tau_1(\beta)$ | $\tau_2(\beta)$ |                             |          |                       |                          |
| SB-Zn(II)Water                | 511                           | 0.80 (65)       | 1.82 (35)       | 1.36                        | 1.20     | 0.02                  | 0.64                     |
| UB-Zn(II)Water                | 511                           | 1.03 (55)       | 2.03 (45)       | 1.64                        | 1.21     | 0.04                  | 0.62                     |
| SB-Zn(II) embedded<br>crystal | 520                           | 0.57(27)        | 3.16 (73)       | 3.01                        | 1.25     | 0.03                  | 0.30                     |
| UB-Zn(II) embedded<br>crystal | 520                           | 1.33 (21)       | 3.65 (79)       | 3.45                        | 1.18     | 0.05                  | 0.21                     |

# Supporting Information

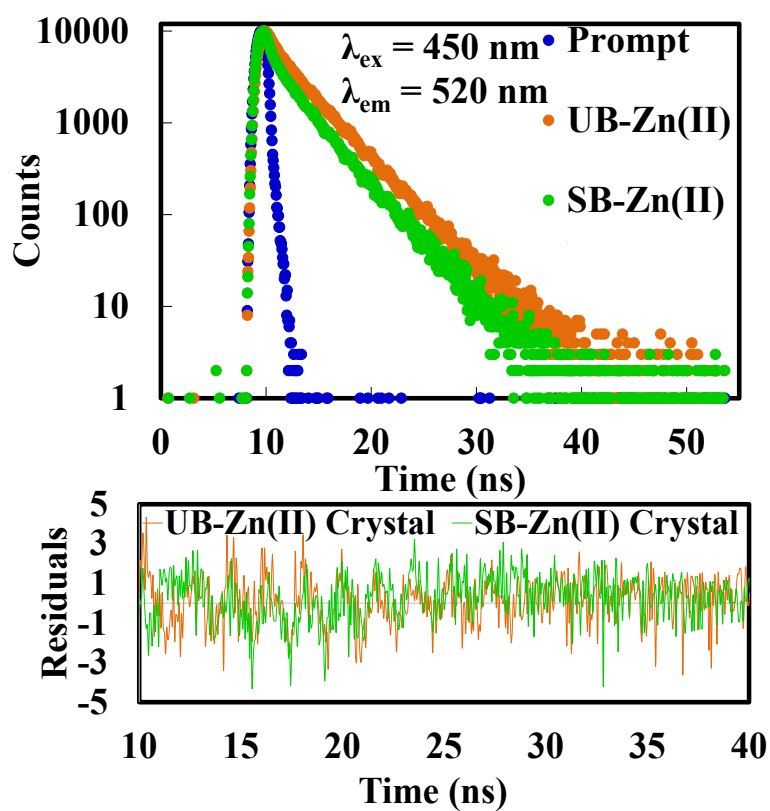

**Figure S6.** Fluorescence lifetime decay of FP-Zn(II) complexes embedded in the surface of zinc acetate crystals



## Supporting Information

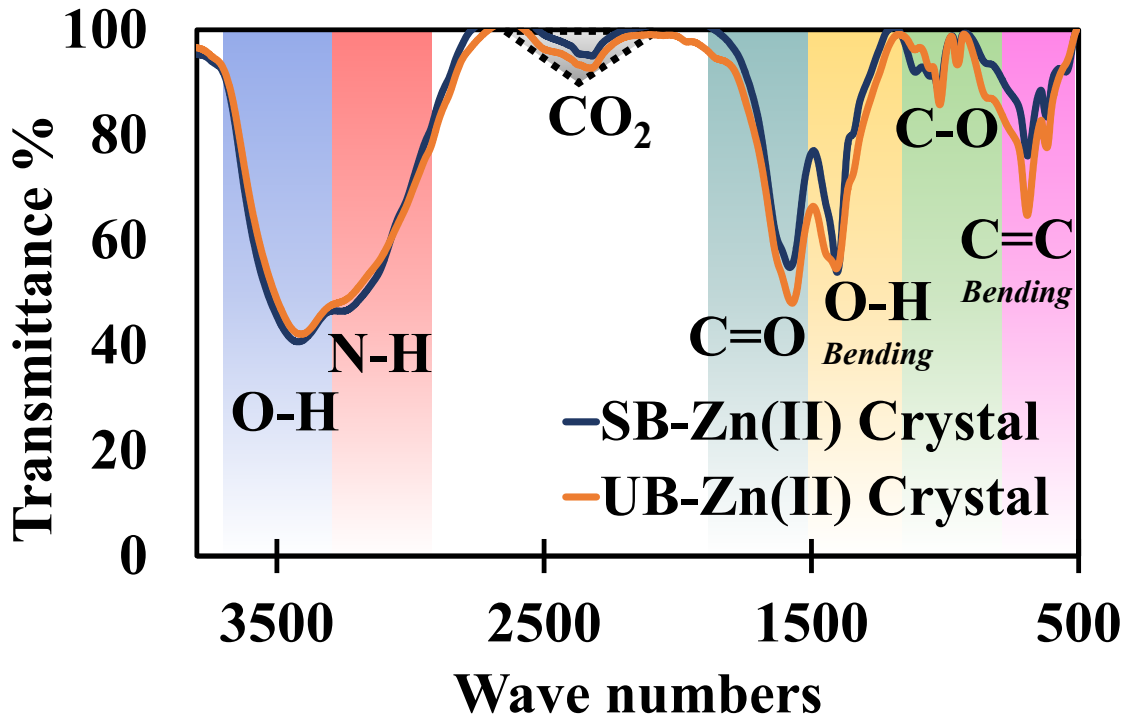

Figure S7. FTIR of FP-Zn(II) embedded in the surface of zinc acetate crystals

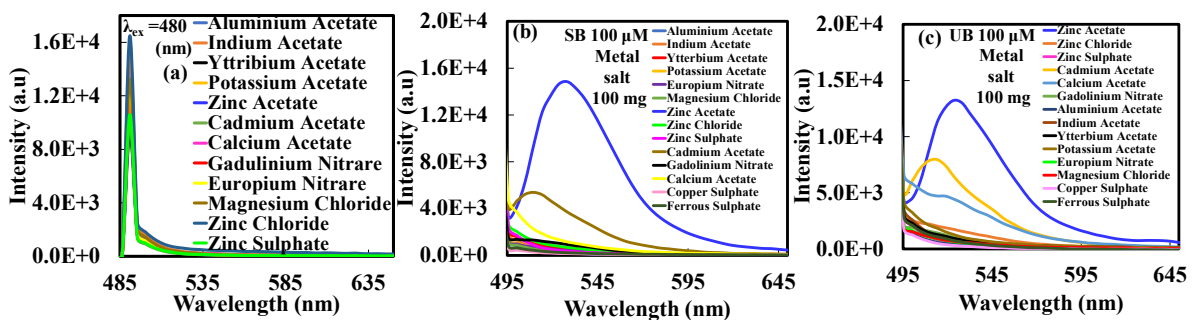

Figure S8. (a) Steady-state emission spectral behaviour of metal salts with excitation 480 nm, (b) Steady-state emission spectral behaviour of various other metal salts drop cast of SB with excitation 480 nm and Steady-state emission spectral behaviour of various other metal salts drop cast of UB with excitation 480 nm

## Supporting Information

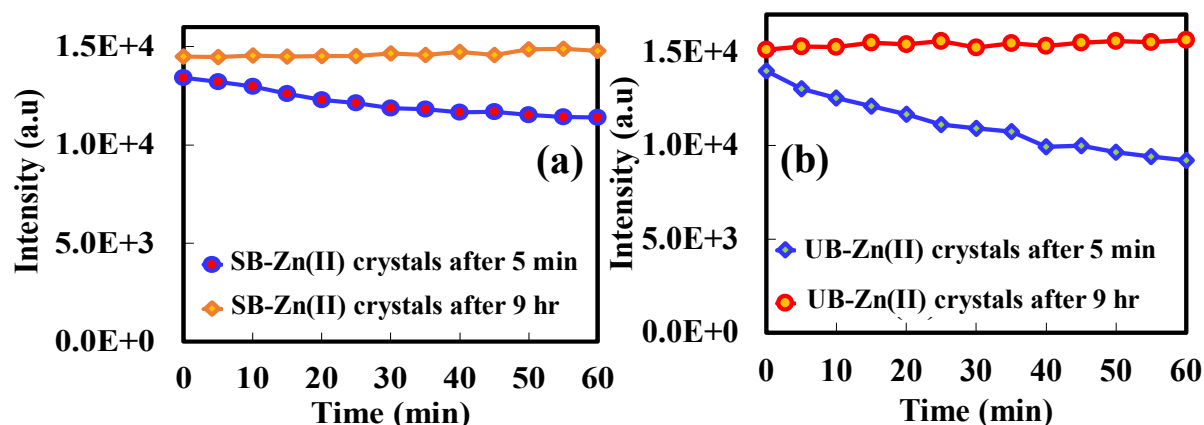

**Figure S9.** (a) Time-dependent change of solid-state fluorescence of SB-Zn(II) embedded in the surface of zinc acetate crystals and (b) Time-dependent change of solid state fluorescence UB-Zn(II) embedded in the surface of zinc acetate crystals

FP-Zn(II) crystal fluorescence intensity slightly decreased in the inertial period because FPs drop cast was not dried properly. But after complete dry of the sample, the fluorescence intensity of FP-Zn(II) crystals was stable with respect to time.

### Stepwise drop casting procedure of FPs on the zinc acetate coated substrate

- 1) The stock solution of zinc acetate was made by taking 1g dissolved in 2 ml of water and sonicating.
- 2) The zinc acetate salt-coated filter papers and TLC plates were prepared by taking a square shaped paper and dipping it into zinc acetate stock solution in water. Then the zinc acetate coated substrate was dried properly as shown in Figure S10.
- 3) The  $\mu\text{M}$  concentration range was chosen for FP and the volume of solution taken was  $30\ \mu\text{L}$ . The volume of  $30\ \mu\text{L}$  was added by micropipette in three steps of  $10\ \mu\text{L}$  each, to enable concentrate the sample within a small area on the zinc acetate coated substrate, due to water evaporation.
- 4) The sample illuminated using a UV torch of 365 nm to check green fluorescence of the FP-Zn(II) complexes on the zinc acetate coated substrate as shown in Figure S10.

# Supporting Information

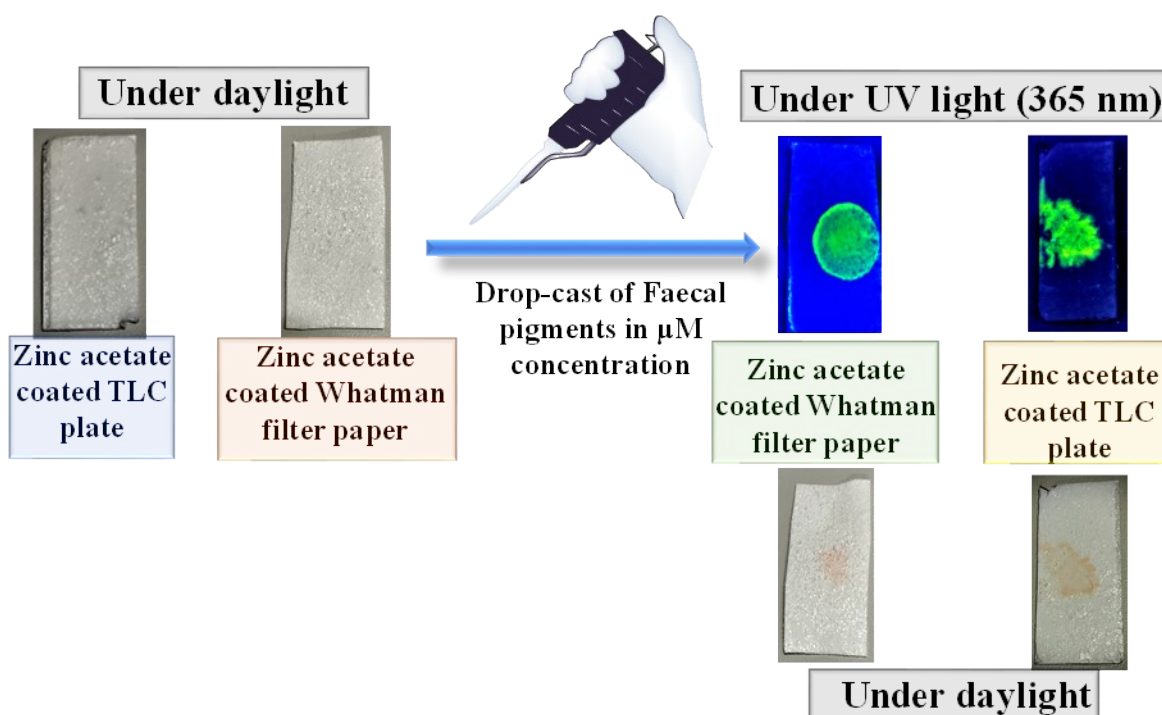

**Figure S10.** Digital photograph presentation of zinc acetate coated over various substrate (TLC plate and cellulose paper). The bright green fluorescence of FP-Zn(II) can be detected with naked eye under UV 365 nm.

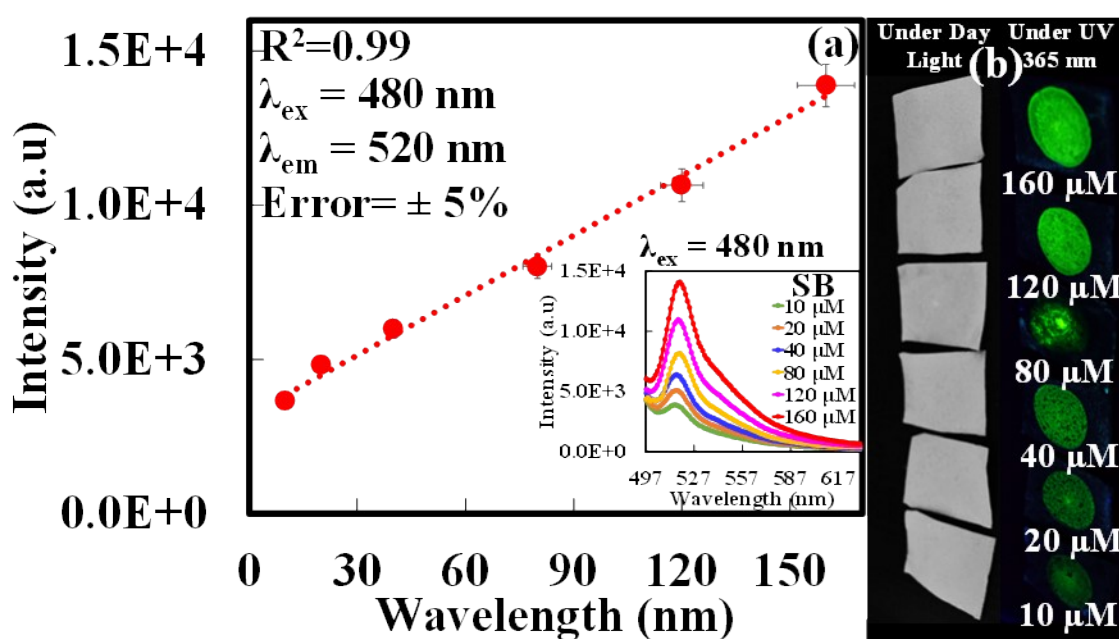

## Supporting Information

**Figure S11.** (a) Calibration plot of SB-Zn(II) after drop cast of SB on cellulose paper coated with zinc acetate salt at excitation wavelength 480 nm and emission wavelength 520 nm. The concentration range of SB was taken as 160-10  $\mu\text{M}$  of volume 30  $\mu\text{L}$ .

**Table S2.** The comparison between the suggested method and previous methods for FPs detection.

| Methods for detection of faecal pigments, urobilin (UB) and stercobilin (SB)                                                                                         | Novelty                                                                                                                             | Detection of faecal pigments in solution state | Detection of faecal pigments in solid-state |
|----------------------------------------------------------------------------------------------------------------------------------------------------------------------|-------------------------------------------------------------------------------------------------------------------------------------|------------------------------------------------|---------------------------------------------|
| Complexation of Zn(II) with urinary UB, significantly enhances the weak fluorescence in absolute alcohol. <sup>1</sup>                                               | Estimation of UB                                                                                                                    | ✓                                              | ✗                                           |
| Detection of UB and SB by high-performance liquid chromatography with fluorimetric detection using Zn(II) complexation. <sup>2</sup>                                 | Estimation of UB and SB up to detection limit (0.2 $\mu\text{g L}^{-1}$ )                                                           | ✓                                              | ✗                                           |
| Solid-phase extraction coupled with high-performance liquid chromatography (HPLC) method. <sup>3</sup>                                                               | Estimation of UB 0.1 $\text{mg L}^{-1}$                                                                                             | ✓                                              | ✗                                           |
| Hydrophilic-lipophilic balance (HLB) cartridges and combing it with high-performance liquid chromatography-electrospray mass spectrometry (HPLC-ES-MS). <sup>4</sup> | Detection limit of UB 300 $\text{ng L}^{-1}$                                                                                        | ✓                                              | ✗                                           |
| UB contained in river sediment was extracted with alkaline buffer solution. <sup>5</sup>                                                                             | Established UB as an faecal indicator in river water analysis                                                                       | ✓                                              | ✗                                           |
| Integrating cavity to detect UB using Zn(II) complexation method in ethanol medium. <sup>6</sup>                                                                     | Femtomolar concentrations of UB detection                                                                                           | ✓                                              | ✗                                           |
| Extraction of UB, SB with 1-hexanol and complexation with Zn(II). <sup>7</sup>                                                                                       | Picomolar concentrations of UB and SB detection                                                                                     | ✓                                              | ✗                                           |
| <b>Rapid and sensitive detection of faecal pigments using their enhanced solid-state green fluorescence on zinc acetate solid substrate (current study).</b>         | <b>Rapid, nonhazardous and naked eye detection of UB and SB. Detection limit up to 10 <math>\mu\text{M}</math> under UV 365 nm.</b> | ✗                                              | ✓                                           |

# Supporting Information

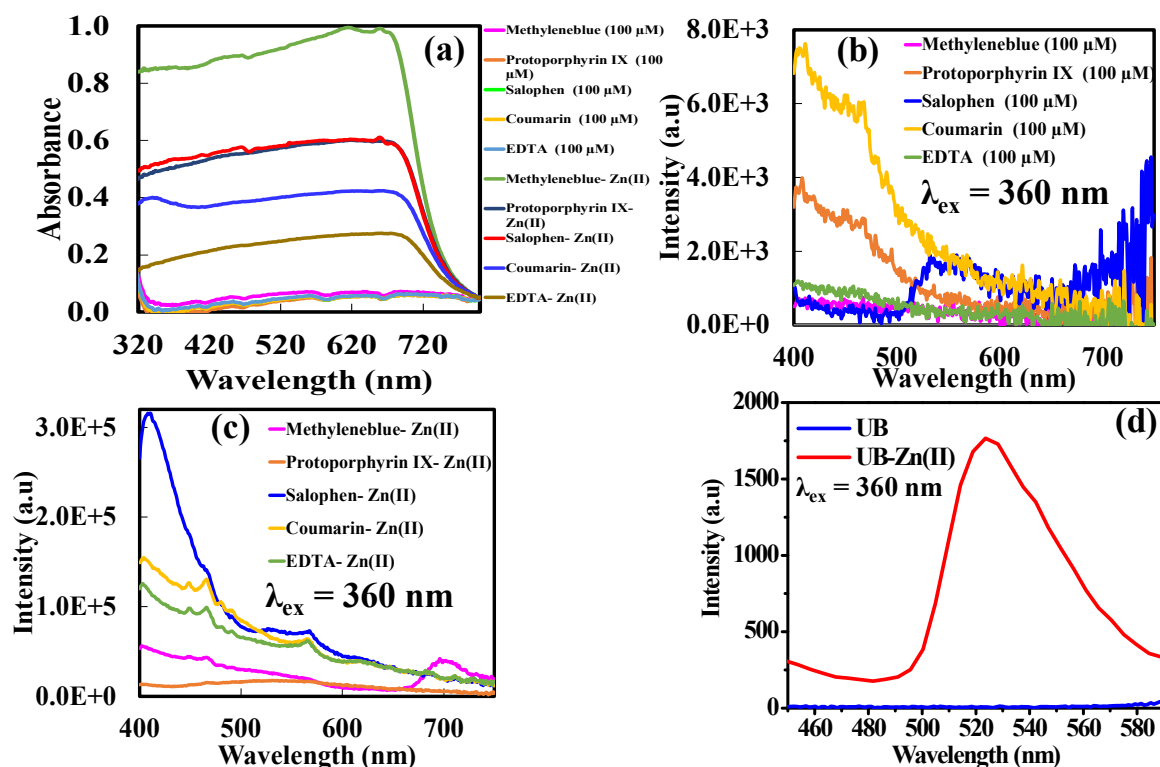

**Figure S12.** (a) Steady-state absorbance spectra of different organic dyes of 100  $\mu$ M concentration and their zinc complexes in the solid state, (b) Steady-state emission spectral behaviour of various organic dyes drop cast of 50  $\mu$ L of 100  $\mu$ M concentration on quartz slide, (c) Steady-state emission spectral behaviour of various organic dyes drop cast of 50  $\mu$ L of 100  $\mu$ M concentration on 100 mg of zinc acetate salt and (d) emission spectra of UB drop cast of 50  $\mu$ L of 100  $\mu$ M concentration on 100 mg of zinc acetate salt. Absorbance and emission spectra were recorded after complete drying of the samples in the solid state.

## Supporting Information

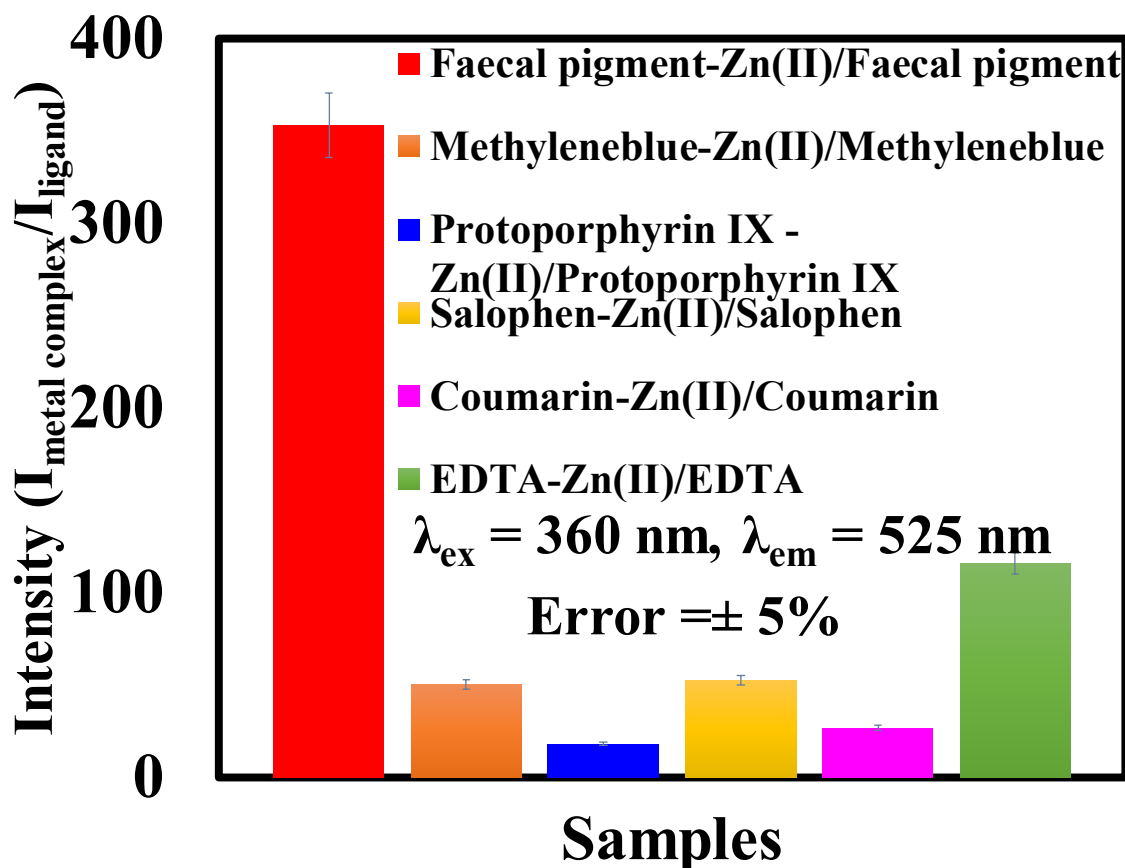

**Figure S13.** Comparison of fluorescence enhancement intensity at excitation of 360 nm and emission 525 nm.

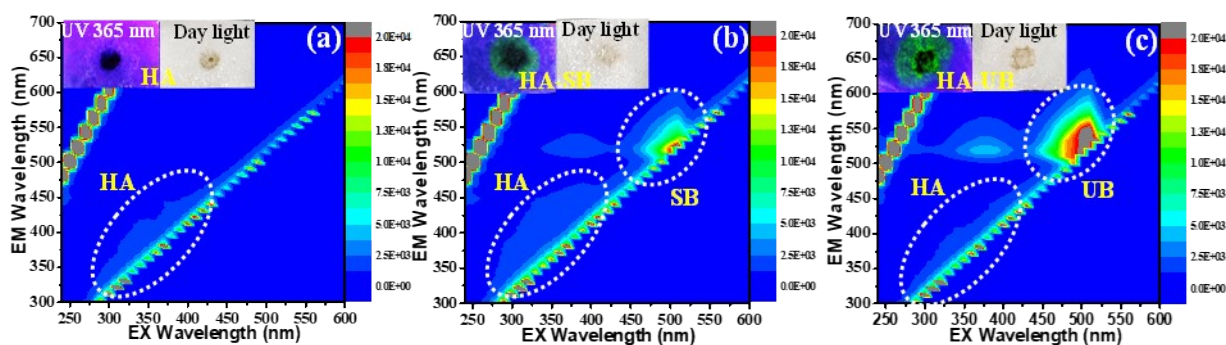

**Figure S14.** (a) EEMF of humic acid (1 mM) drop cast of 30  $\mu\text{L}$  volume on zinc coated filter paper, (b) EEMF of humic acid (1 mM)-SB (80  $\mu\text{M}$ ) drop cast of 30  $\mu\text{L}$  volume on zinc coated filter paper and (c) EEMF of humic acid (1 mM)-UB (80  $\mu\text{M}$ ) drop cast of 30  $\mu\text{L}$  volume on zinc coated filter paper

## Supporting Information

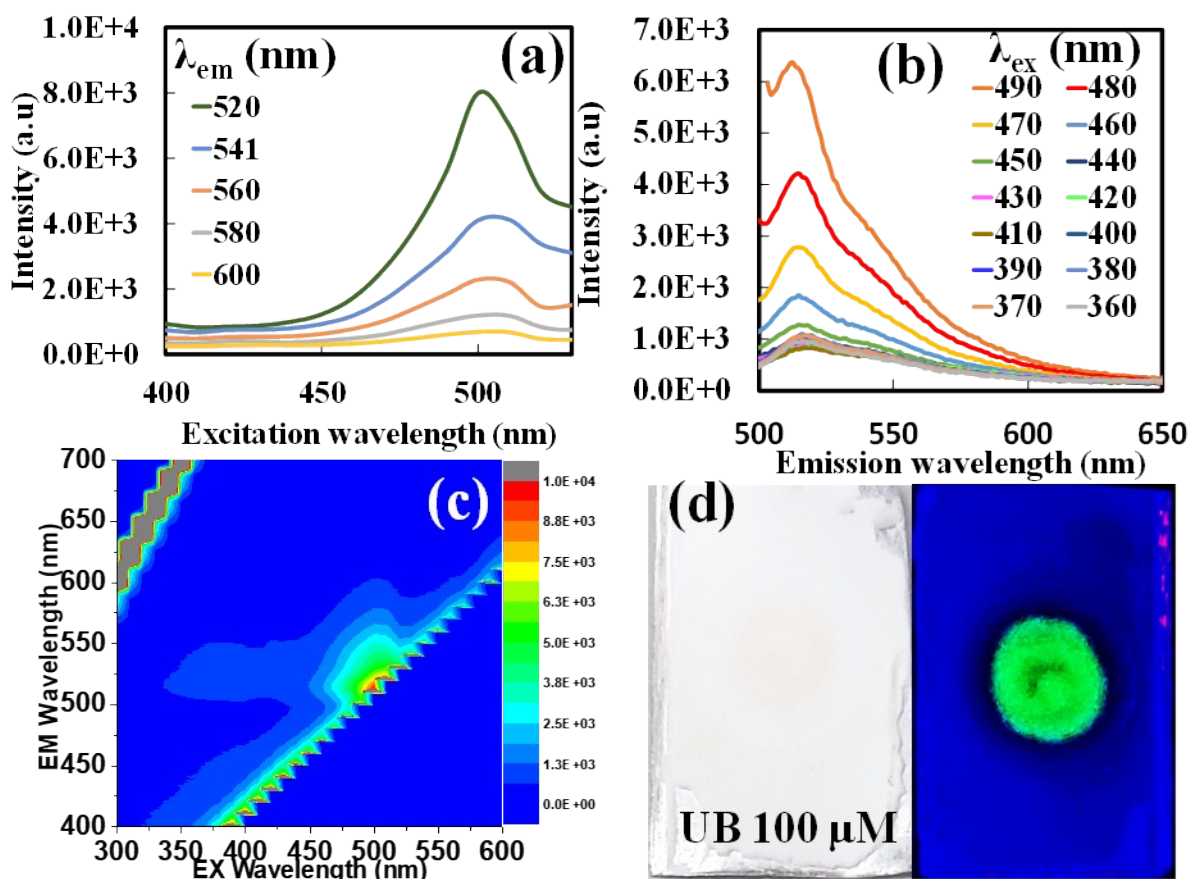

**Figure S15.** (a) Excitation spectra of UB-Zn(II) drop cast on TLC plate, (b) Emission spectra of UB-Zn(II) drop cast on TLC plate (c) EEMF of UB-Zn(II) drop cast of 30  $\mu$ L volume on TLC plate and (d) digital photograph of UB-Zn(II) drop cast of 30  $\mu$ L volume on TLC plate.

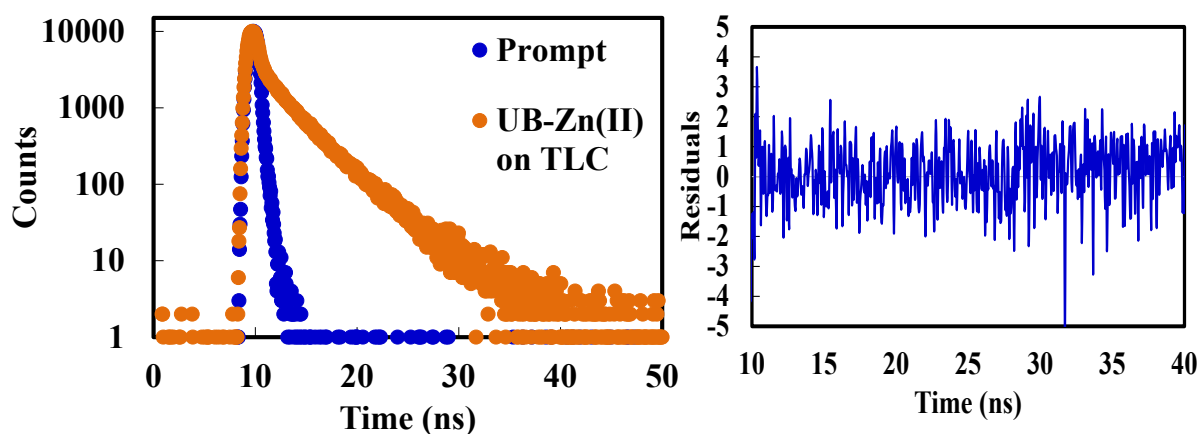

**Figure S16.** Fluorescence lifetime decay of UB-Zn(II) complexes on the silica coated TLC plate

## Supporting Information

**Table S3.** Fluorescence lifetime ( $\tau$ , ns) of UB-Zn(II) complexes on TLC at emission maximum 520 nm wavelength. The relative amplitude is given in parentheses.  $\lambda_{\text{ex}} = 450$  nm. The error in the measurement =  $\pm 5\%$ .

| Samples          | $\lambda_{\text{ex}} = 450$ | Lifetime (ns)   |                 |                 | $\chi^2$ |
|------------------|-----------------------------|-----------------|-----------------|-----------------|----------|
|                  | nm                          | $\tau_1(\beta)$ | $\tau_2(\beta)$ | $\tau_3(\beta)$ |          |
|                  | $\lambda_{\text{em}}$ (nm)  |                 |                 |                 |          |
| UB-Zn(II) on TLC | 520                         | 1.82 (26)       | 0.27 (38)       | 3.85<br>(36)    | 1.12     |

Bi- exponential decay fitting was not achieved due to very high scattering on the surface of silica coated TLC plate. Hence the fitting for lifetime was carried out by tri- exponential decay fitting. Lifetime component  $\tau_1$ ,  $\tau_3$  and their relative amplitude reasonable match with UB-Zn(II) crystals as shown in Table S1.  $\tau_2$  was assigned as a scattering component.

### References

1. S. Marcussen and S. Hansen, *Journal of Biological Chemistry*, 1918, **36**, 381-389.
2. Y. Miyabara, M. Tabata, J. Suzuki and S. Suzuki, *Journal of Chromatography B: Biomedical Sciences and Applications*, 1992, **574**, 261-265.
3. E. A. Picos and A. A. de la Cruz, *Journal of Liquid Chromatography & Related Technologies*, 2000, **23**, 1281-1291.
4. T. L. Jones-Lepp, *Journal of Environmental Monitoring*, 2006, **8**, 472-478.
5. Y. Miyabara, K. Miyata, J. Suzuki and S. Suzuki, *Environmental pollution*, 1994, **84**, 111-115.
6. J. N. Bixler, M. T. Cone, B. H. Hokr, J. D. Mason, E. Figueroa, E. S. Fry, V. V. Yakovlev and M. O. Scully, *Proceedings of the National Academy of Sciences of the United States of America*, 2014, **111**, 7208-7211.
7. S. Prakash and A. K. Mishra, *Analytical Methods*, 2021, **13**, 5573-5588.
